# Supplementary material for: Discovery of Flavonoids as Novel Inhibitors of ATP Citrate Lyase: Structure–Activity Relationship and Inhibition Profiles
Source: MDPI journal article supplement (doi:10.3390/ijms231810747), 2022-09-15
Supplement: s1 [file s1]

**Discovery of flavonoids as novel inhibitors of ATP citrate lyase: structure-activity relationship and inhibition profile**

Pan Wang<sup>a,b</sup>, Tao Hou<sup>a,c</sup>, Fangfang Xu<sup>c</sup>, Fengbin Luo<sup>c</sup>, Han Zhou<sup>a,c</sup>, Fan Liu<sup>a,b</sup>, Yanfang Liu<sup>a,c</sup>, Jixia Wang<sup>a,c,\*</sup>, Zhimou Guo<sup>a,c,\*</sup>, Xinmiao Liang<sup>a,c</sup>

<sup>a</sup> CAS Key Laboratory of Separation Science for Analytical Chemistry, Dalian Institute of Chemical Physics, Chinese Academy of Sciences, Dalian 116023, China

<sup>b</sup> University of Chinese Academy of Sciences, Beijing 100000, China

<sup>c</sup> Jiangxi Provincial Key Laboratory for Pharmacodynamic Material Basis of Traditional Chinese Medicine, Ganjiang Chinese Medicine Innovation Center, Nanchang 330000, China

Corresponding Authors: Jixia Wang, Zhimou Guo

Tel.: +86 411 84379519; fax: +86 411 84379539.

E-mail addresses: jxwang@dicp.ac.cn, guozhimou@dicp.ac.cn



gossypetin (E), respectively.

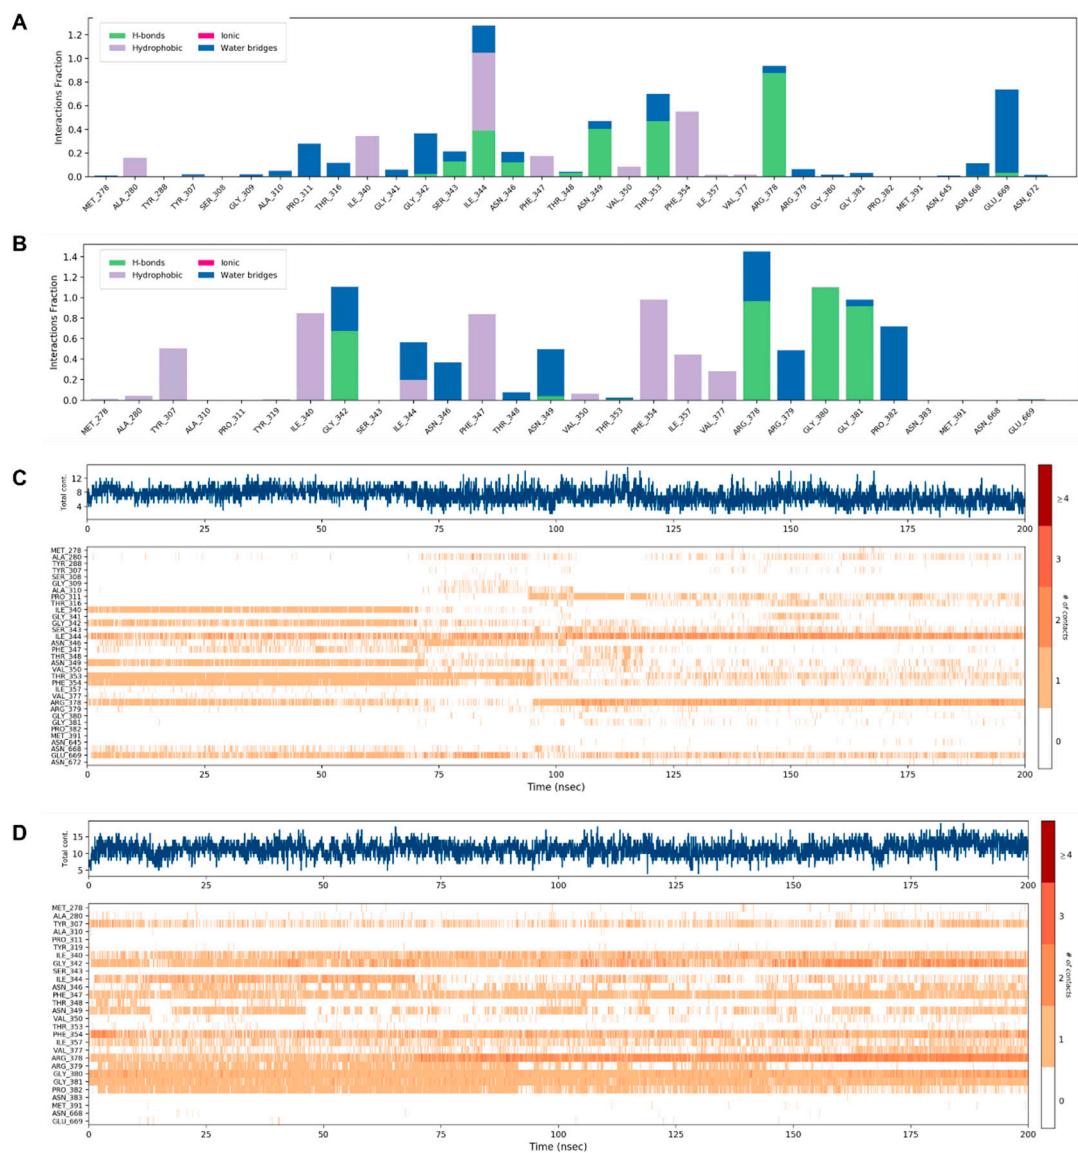

**Figure S3.** Interactions and contacts between ACLY and ligands throughout the simulation. (A) Interactions for herbacetin or NDI-091143 (B) binding to ACLY. (C) Contacts for herbacetin or NDI-091143 (D) binding to ACLY.

**Table S1** Information of 138 selected flavonoids

|   | Compound                   | CAS        | Formula                                         |
|---|----------------------------|------------|-------------------------------------------------|
| 1 | Narcissin                  | 604-80-8   | C <sub>28</sub> H <sub>32</sub> O <sub>16</sub> |
| 2 | Kaempferitrin              | 482-38-2   | C <sub>27</sub> H <sub>30</sub> O <sub>14</sub> |
| 3 | Oroxylin A-7-O-glucuronide | 36948-76-2 | C <sub>22</sub> H <sub>20</sub> O <sub>11</sub> |
| 4 | Apigenin-7-glucuronide     | 29741-09-1 | C <sub>21</sub> H <sub>18</sub> O <sub>11</sub> |
| 5 | Luteolin 7-O-glucuronide   | 29741-10-4 | C <sub>21</sub> H <sub>18</sub> O <sub>12</sub> |
| 6 | Hyperoside                 | 482-36-0   | C <sub>21</sub> H <sub>20</sub> O <sub>12</sub> |
| 7 | Irisflorentin              | 41743-73-1 | C <sub>20</sub> H <sub>18</sub> O <sub>8</sub>  |

|    |                                   |            |                                                 |
|----|-----------------------------------|------------|-------------------------------------------------|
| 8  | Tectoridin                        | 611-40-5   | C <sub>22</sub> H <sub>22</sub> O <sub>11</sub> |
| 9  | Tectorigenin                      | 548-77-6   | C <sub>16</sub> H <sub>12</sub> O <sub>6</sub>  |
| 10 | Narirutin                         | 14259-46-2 | C <sub>27</sub> H <sub>32</sub> O <sub>14</sub> |
| 11 | Poncirin                          | 14941-08-3 | C <sub>28</sub> H <sub>34</sub> O <sub>14</sub> |
| 12 | Didymin                           | 14259-47-3 | C <sub>28</sub> H <sub>34</sub> O <sub>14</sub> |
| 13 | Orientin                          | 28608-75-5 | C <sub>21</sub> H <sub>20</sub> O <sub>11</sub> |
| 14 | Isoorientin                       | 4261-42-1  | C <sub>21</sub> H <sub>20</sub> O <sub>11</sub> |
| 15 | Lonicerin                         | 25694-72-8 | C <sub>27</sub> H <sub>30</sub> O <sub>15</sub> |
| 16 | Diosmetin-7-O-β-D-glucopyranoside | 20126-59-4 | C <sub>22</sub> H <sub>22</sub> O <sub>11</sub> |
| 17 | Acacetin                          | 480-44-4   | C <sub>16</sub> H <sub>12</sub> O <sub>5</sub>  |
| 18 | Herbacetin                        | 527-95-7   | C <sub>15</sub> H <sub>10</sub> O <sub>7</sub>  |
| 19 | Taxifolin                         | 480-18-2   | C <sub>15</sub> H <sub>12</sub> O <sub>7</sub>  |
| 20 | Isoquercetin                      | 482-35-9   | C <sub>21</sub> H <sub>20</sub> O <sub>12</sub> |
| 21 | Apigenin                          | 520-36-5   | C <sub>15</sub> H <sub>10</sub> O <sub>5</sub>  |
| 22 | Tricin                            | 520-32-1   | C <sub>17</sub> H <sub>14</sub> O <sub>7</sub>  |
| 23 | Hesperidin                        | 520-26-3   | C <sub>28</sub> H <sub>34</sub> O <sub>15</sub> |
| 24 | Pinocembrin                       | 480-39-7   | C <sub>15</sub> H <sub>12</sub> O <sub>4</sub>  |
| 25 | Calycosin-7-O-β-D-glucoside       | 20633-67-4 | C <sub>22</sub> H <sub>22</sub> O <sub>10</sub> |
| 26 | Ononin                            | 486-62-4   | C <sub>22</sub> H <sub>22</sub> O <sub>9</sub>  |
| 27 | Calycosin                         | 20575-57-9 | C <sub>16</sub> H <sub>12</sub> O <sub>5</sub>  |
| 28 | Formononetin                      | 485-72-3   | C <sub>16</sub> H <sub>12</sub> O <sub>4</sub>  |
| 29 | Quercetin                         | 117-39-5   | C <sub>15</sub> H <sub>10</sub> O <sub>7</sub>  |
| 30 | Kaempferol                        | 520-18-3   | C <sub>15</sub> H <sub>10</sub> O <sub>6</sub>  |
| 31 | Naringenin                        | 480-41-1   | C <sub>15</sub> H <sub>12</sub> O <sub>5</sub>  |
| 32 | Rutin                             | 153-18-4   | C <sub>27</sub> H <sub>30</sub> O <sub>16</sub> |
| 33 | Glabridin                         | 59870-68-7 | C <sub>20</sub> H <sub>20</sub> O <sub>4</sub>  |
| 34 | Liquiritigenin                    | 578-86-9   | C <sub>15</sub> H <sub>12</sub> O <sub>4</sub>  |
| 35 | Liquiritin                        | 551-15-5   | C <sub>21</sub> H <sub>22</sub> O <sub>9</sub>  |
| 36 | Liquiritin apioside               | 74639-14-8 | C <sub>26</sub> H <sub>30</sub> O <sub>13</sub> |
| 37 | Glabrone                          | 60008-02-8 | C <sub>20</sub> H <sub>16</sub> O <sub>5</sub>  |
| 38 | Licoflavone A                     | 61153-77-3 | C <sub>20</sub> H <sub>18</sub> O <sub>4</sub>  |
| 39 | Licoflavone B                     | 91433-17-9 | C <sub>25</sub> H <sub>26</sub> O <sub>4</sub>  |
| 40 | Licoflavone C                     | 72357-31-4 | C <sub>20</sub> H <sub>18</sub> O <sub>5</sub>  |
| 41 | Glabrol                           | 59870-65-4 | C <sub>25</sub> H <sub>28</sub> O <sub>4</sub>  |
| 42 | Genkwanin                         | 437-64-9   | C <sub>16</sub> H <sub>12</sub> O <sub>5</sub>  |
| 43 | Naringin                          | 10236-47-2 | C <sub>27</sub> H <sub>32</sub> O <sub>14</sub> |
| 44 | Isorhamnetin                      | 480-19-3   | C <sub>16</sub> H <sub>12</sub> O <sub>7</sub>  |
| 45 | Baicalin                          | 21967-41-9 | C <sub>21</sub> H <sub>18</sub> O <sub>11</sub> |
| 46 | Baicalein                         | 491-67-8   | C <sub>15</sub> H <sub>10</sub> O <sub>5</sub>  |
| 47 | Wogonin                           | 632-85-9   | C <sub>16</sub> H <sub>12</sub> O <sub>5</sub>  |
| 48 | Wogonoside                        | 51059-44-0 | C <sub>22</sub> H <sub>20</sub> O <sub>11</sub> |
| 49 | Oroxylin A                        | 480-11-5   | C <sub>16</sub> H <sub>12</sub> O <sub>5</sub>  |

|    |                                     |             |                                                 |
|----|-------------------------------------|-------------|-------------------------------------------------|
| 50 | Chrysin                             | 480-40-0    | C <sub>15</sub> H <sub>10</sub> O <sub>4</sub>  |
| 51 | Luteolin                            | 491-70-3    | C <sub>15</sub> H <sub>10</sub> O <sub>6</sub>  |
| 52 | Scutellarin                         | 529-53-3    | C <sub>15</sub> H <sub>10</sub> O <sub>6</sub>  |
| 53 | Scutellarin                         | 27740-01-8  | C <sub>21</sub> H <sub>18</sub> O <sub>12</sub> |
| 54 | Neohesperidin                       | 13241-33-3  | C <sub>28</sub> H <sub>34</sub> O <sub>15</sub> |
| 55 | Rhoifolin                           | 17306-46-6  | C <sub>27</sub> H <sub>30</sub> O <sub>14</sub> |
| 56 | Hesperetin                          | 520-33-2    | C <sub>16</sub> H <sub>14</sub> O <sub>6</sub>  |
| 57 | Diosmetin                           | 520-34-3    | C <sub>16</sub> H <sub>12</sub> O <sub>6</sub>  |
| 58 | Sinensetin                          | 2306-27-6   | C <sub>20</sub> H <sub>20</sub> O <sub>7</sub>  |
| 59 | Nobiletin                           | 478-01-3    | C <sub>21</sub> H <sub>22</sub> O <sub>8</sub>  |
| 60 | 5-O-Demethylnobiletin               | 2174-59-6   | C <sub>20</sub> H <sub>20</sub> O <sub>8</sub>  |
| 61 | Tangeretin                          | 481-53-8    | C <sub>20</sub> H <sub>20</sub> O <sub>7</sub>  |
| 62 | Isosinensetin                       | 17290-70-9  | C <sub>20</sub> H <sub>20</sub> O <sub>7</sub>  |
| 63 | 3,5,6,7,8,3',4'-Heptamethoxyflavone | 1178-24-1   | C <sub>22</sub> H <sub>24</sub> O <sub>9</sub>  |
| 64 | Kuwanon A                           | 62949-77-3  | C <sub>25</sub> H <sub>24</sub> O <sub>6</sub>  |
| 65 | Isoginkgetin                        | 548-19-6    | C <sub>32</sub> H <sub>22</sub> O <sub>10</sub> |
| 66 | methylapigenin                      | 5128-44-9   | C <sub>17</sub> H <sub>14</sub> O <sub>5</sub>  |
| 67 | Icariin                             | 489-32-7    | C <sub>33</sub> H <sub>40</sub> O <sub>15</sub> |
| 68 | Icaritin                            | 118525-40-9 | C <sub>21</sub> H <sub>20</sub> O <sub>6</sub>  |
| 69 | Anhydroicaritin                     | 38226-86-7  | C <sub>21</sub> H <sub>20</sub> O <sub>6</sub>  |
| 70 | Tricin                              | 520-32-1    | C <sub>17</sub> H <sub>14</sub> O <sub>7</sub>  |
| 71 | Chrysoeriol                         | 491-71-4    | C <sub>16</sub> H <sub>12</sub> O <sub>6</sub>  |
| 72 | Casticin                            | 479-91-4    | C <sub>19</sub> H <sub>18</sub> O <sub>8</sub>  |
| 73 | Catechin                            | 154-23-4    | C <sub>15</sub> H <sub>14</sub> O <sub>6</sub>  |
| 74 | Cyanidin chloride                   | 528-58-5    | C <sub>15</sub> H <sub>11</sub> O <sub>6</sub>  |
| 75 | Epicatechin                         | 490-46-0    | C <sub>15</sub> H <sub>14</sub> O <sub>6</sub>  |
| 76 | Eriodictyol                         | 552-58-9    | C <sub>15</sub> H <sub>12</sub> O <sub>6</sub>  |
| 77 | Eupatilin                           | 22368-21-4  | C <sub>18</sub> H <sub>16</sub> O <sub>7</sub>  |
| 78 | Galangin                            | 548-83-4    | C <sub>15</sub> H <sub>10</sub> O <sub>5</sub>  |
| 79 | Gardenin B                          | 2798-20-1   | C <sub>19</sub> H <sub>18</sub> O <sub>7</sub>  |
| 80 | Genistein                           | 446-72-0    | C <sub>15</sub> H <sub>10</sub> O <sub>5</sub>  |
| 81 | Glycitein                           | 40957-83-3  | C <sub>16</sub> H <sub>12</sub> O <sub>5</sub>  |
| 82 | Irigenin                            | 548-76-5    | C <sub>18</sub> H <sub>16</sub> O <sub>8</sub>  |
| 83 | Isoanhydroicaritin                  | 28610-30-2  | C <sub>21</sub> H <sub>20</sub> O <sub>6</sub>  |
| 84 | Isosilybin                          | 72581-71-6  | C <sub>25</sub> H <sub>22</sub> O <sub>10</sub> |
| 85 | Kaempferide                         | 491-54-3    | C <sub>16</sub> H <sub>12</sub> O <sub>6</sub>  |
| 86 | Kushenol F                          | 97938-30-2  | C <sub>25</sub> H <sub>28</sub> O <sub>6</sub>  |
| 87 | Morin                               | 480-16-0    | C <sub>15</sub> H <sub>10</sub> O <sub>7</sub>  |
| 88 | Morusin                             | 62596-29-6  | C <sub>25</sub> H <sub>24</sub> O <sub>6</sub>  |
| 89 | Myricetin                           | 529-44-2    | C <sub>15</sub> H <sub>10</sub> O <sub>8</sub>  |
| 90 | Neobavaisoflavone                   | 41060-15-5  | C <sub>20</sub> H <sub>18</sub> O <sub>4</sub>  |
| 91 | Pectolinarigenin                    | 520-12-7    | C <sub>17</sub> H <sub>14</sub> O <sub>6</sub>  |

|     |                                                                                                 |             |                                                 |
|-----|-------------------------------------------------------------------------------------------------|-------------|-------------------------------------------------|
| 92  | 7,4'-Dihydroxyflavone                                                                           | 2196-14-7   | C <sub>15</sub> H <sub>10</sub> O <sub>4</sub>  |
| 93  | Gossypetin                                                                                      | 489-35-0    | C <sub>15</sub> H <sub>10</sub> O <sub>8</sub>  |
| 94  | Bilobtin                                                                                        | 521-32-4    | C <sub>31</sub> H <sub>20</sub> O <sub>10</sub> |
| 95  | 5,7-Dihydrox -4'-methoxyisoflavone                                                              | 491-80-5    | C <sub>16</sub> H <sub>12</sub> O <sub>5</sub>  |
| 96  | Daidzein                                                                                        | 486-66-8    | C <sub>15</sub> H <sub>10</sub> O <sub>4</sub>  |
| 97  | Daidzin                                                                                         | 552-66-9    | C <sub>21</sub> H <sub>20</sub> O <sub>9</sub>  |
| 98  | Dihydromyricetin                                                                                | 27200-12-0  | C <sub>15</sub> H <sub>12</sub> O <sub>8</sub>  |
| 99  | Epmedin B                                                                                       | 110623-73-9 | C <sub>38</sub> H <sub>48</sub> O <sub>19</sub> |
| 100 | Ginkgetin                                                                                       | 481-46-9    | C <sub>32</sub> H <sub>22</sub> O <sub>10</sub> |
| 101 | Homoplantagin                                                                                   | 17680-84-1  | C <sub>22</sub> H <sub>22</sub> O <sub>11</sub> |
| 102 | Jaceosidin                                                                                      | 18085-97-7  | C <sub>17</sub> H <sub>14</sub> O <sub>7</sub>  |
| 103 | Procyanidin B1                                                                                  | 20315-25-7  | C <sub>30</sub> H <sub>26</sub> O <sub>12</sub> |
| 104 | Procyanidin B2                                                                                  | 29106-49-8  | C <sub>30</sub> H <sub>26</sub> O <sub>12</sub> |
| 105 | Puerarin                                                                                        | 3681-99-0   | C <sub>21</sub> H <sub>20</sub> O <sub>9</sub>  |
| 106 | 7-( $\alpha$ -L-Rhamnopyranosyloxy)-2-(3,4-dihydroxyphenyl)-3,5-dihydroxy-4H-1-benzopyran-4-one | 22007-72-3  | C <sub>21</sub> H <sub>20</sub> O <sub>11</sub> |
| 107 | Quercitrin                                                                                      | 522-12-3    | C <sub>21</sub> H <sub>20</sub> O <sub>11</sub> |
| 108 | Sakuranetin                                                                                     | 2957-21-3   | C <sub>16</sub> H <sub>14</sub> O <sub>5</sub>  |
| 109 | Sciadopitysin                                                                                   | 521-34-6    | C <sub>33</sub> H <sub>24</sub> O <sub>10</sub> |
| 110 | Silibinin                                                                                       | 22888-70-6  | C <sub>25</sub> H <sub>22</sub> O <sub>10</sub> |
| 111 | Silicristin                                                                                     | 33889-69-9  | C <sub>25</sub> H <sub>22</sub> O <sub>10</sub> |
| 112 | Silydianin                                                                                      | 29782-68-1  | C <sub>25</sub> H <sub>22</sub> O <sub>10</sub> |
| 113 | Spinosin                                                                                        | 72063-39-9  | C <sub>28</sub> H <sub>32</sub> O <sub>15</sub> |
| 114 | Vitexin                                                                                         | 3681-93-4   | C <sub>21</sub> H <sub>20</sub> O <sub>10</sub> |
| 115 | 5,7,3'-Trihydroxy-6,4',5'-triMethoxyflavone                                                     | 78417-26-2  | C <sub>18</sub> H <sub>16</sub> O <sub>8</sub>  |
| 116 | 5,7,8,4"-Tetramethoxyflavone                                                                    | 6601-66-7   | C <sub>19</sub> H <sub>18</sub> O <sub>6</sub>  |
| 117 | 3'-Demethylnobiletin                                                                            | 112448-39-2 | C <sub>20</sub> H <sub>20</sub> O <sub>8</sub>  |
| 118 | Podocarpusflavone A                                                                             | 22136-74-9  | C <sub>31</sub> H <sub>20</sub> O <sub>10</sub> |
| 119 | 4'-O-Methylochnaflavone                                                                         | 49619-87-6  | C <sub>31</sub> H <sub>20</sub> O <sub>10</sub> |
| 120 | Baicalin methyl ester                                                                           | 82475-03-4  | C <sub>22</sub> H <sub>20</sub> O <sub>11</sub> |
| 121 | 5-Methyl-7-methoxyisoflavone                                                                    | 82517-12-2  | C <sub>17</sub> H <sub>14</sub> O <sub>3</sub>  |
| 122 | Isosakuranetin                                                                                  | 480-43-3    | C <sub>16</sub> H <sub>14</sub> O <sub>5</sub>  |
| 123 | Chrysosplenetin B                                                                               | 603-56-5    | C <sub>19</sub> H <sub>18</sub> O <sub>8</sub>  |
| 124 | Isovitexin                                                                                      | 29702-25-8  | C <sub>21</sub> H <sub>20</sub> O <sub>10</sub> |
| 125 | Typhaneoside                                                                                    | 104472-68-6 | C <sub>34</sub> H <sub>42</sub> O <sub>20</sub> |
| 126 | (+)-Galocatechin                                                                                | 970-73-0    | C <sub>15</sub> H <sub>14</sub> O <sub>7</sub>  |
| 127 | Liquiritigenin                                                                                  | 578-86-9    | C <sub>15</sub> H <sub>12</sub> O <sub>4</sub>  |
| 128 | Naringenin                                                                                      | 67604-48-2  | C <sub>15</sub> H <sub>12</sub> O <sub>5</sub>  |
| 129 | (-)-Catechin hydrate                                                                            | 18829-70-4  | C <sub>15</sub> H <sub>14</sub> O <sub>6</sub>  |
| 130 | Vitexin                                                                                         | 3681-93-4   | C <sub>21</sub> H <sub>20</sub> O <sub>10</sub> |
| 131 | Vicenin                                                                                         | 23666-13-9  | C <sub>27</sub> H <sub>30</sub> O <sub>15</sub> |

|     |                                                        |            |                                                 |
|-----|--------------------------------------------------------|------------|-------------------------------------------------|
| 132 | Vicenin -1                                             | 35927-38-9 | C <sub>26</sub> H <sub>28</sub> O <sub>14</sub> |
| 133 | 6-beta-D-Glucopyranosyl-8-beta-D-xylopyranosylapigenin | 59914-91-9 | C <sub>26</sub> H <sub>28</sub> O <sub>14</sub> |
| 134 | Cynaroside                                             | 5373-11-5  | C <sub>21</sub> H <sub>20</sub> O <sub>11</sub> |
| 135 | Apigenin 7-glucoside                                   | 578-74-5   | C <sub>21</sub> H <sub>20</sub> O <sub>10</sub> |
| 136 | Hispidulin                                             | 1447-88-7  | C <sub>16</sub> H <sub>12</sub> O <sub>6</sub>  |
| 137 | 6-Methoxyluteolin                                      | 520-11-6   | C <sub>16</sub> H <sub>12</sub> O <sub>7</sub>  |
| 138 | Plantagoside                                           | 78708-33-5 | C <sub>21</sub> H <sub>22</sub> O <sub>12</sub> |

**Table S2** Docking studies of ligands binding to ACLY

| Ligand name | Docking score | MM-GBSA | Interaction                 |
|-------------|---------------|---------|-----------------------------|
| NDI-091143  | -9.872        | -57.26  | PHE347 PHE354 ARG378 GLY380 |
| Herbacetin  | -9.673        | -50.94  | ASN346 THR348 ASN349 THR353 |
| Quercetin   | -7.092        | -48.05  | THR348 ASN349 PHE354        |
| Luteolin    | -8.000        | -47.51  | THR348 ASN349 ARG378        |
| Scutellarin | -9.307        | -49.06  | ASN346 THR348 ASN349 ARG378 |
| Myricetin   | -7.064        | -44.39  | THR348 ASN349 PHE354        |
| Gossypetin  | -7.404        | -52.31  | THR348 ASN349 THR353 PHE354 |
